# Supplementary material for: LC-MS Based Phytochemical Profiling towards the Identification of Antioxidant Markers in Some Endemic Aloe Species from Mascarene Islands
Source: MDPI journal article supplement (doi:10.3390/antiox12010050), 2022-12-26
Supplement: s1 [file s1]

# LC-MS based phytochemical profiling towards the identification of antioxidant markers in some endemic *Aloe* species from Mascarene Islands

Célia Breaud <sup>1,†</sup>, Laura Lallemand <sup>2,†</sup>, Gary Mares <sup>2</sup>, Fathi Mabrouki <sup>1</sup>, Myriam Bertolotti <sup>1</sup>, Charlotte Simmler <sup>1</sup>, Stéphane Greff <sup>1</sup>, Morgane Mauduit <sup>1</sup>, Gaëtan Herbette <sup>3</sup>, Eldar Garayev <sup>4</sup>, Christophe Lavergne <sup>5</sup>, Maya Cesari <sup>2</sup>, Sok-Siya Bun-Llopet <sup>1</sup>, Béatrice Baghdikian <sup>1</sup> and Elnur Garayev <sup>1\*</sup>

<sup>1</sup> Aix Marseille Univ, CNRS 7263, IRD 237, Avignon Université, IMBE, 27 blvd Jean Moulin, Service of Pharmacognosy, Faculty of Pharmacy, 13385 Marseille, France.

<sup>2</sup> CYROI, Plateforme de recherche, Cyclotron Réunion Océan Indien, La Réunion, France

<sup>3</sup> CNRS, Centrale Marseille, FSCM, Spectropole, Aix Marseille Université, Campus de St Jérôme-Service 511, 13397 Marseille, France.

<sup>4</sup> Department of General and Toxicological Chemistry, Azerbaijan Medical University, AZ1001, Baku, Azerbaijan

<sup>5</sup> CBNM Conservatoire Botanique National de Mascarin, 2, rue du Père Georges, Les Colimaçons, 97436 Saint-Leu, La Réunion, France

\* Correspondence: elnur.garayev@imbe.fr

† These authors contributed equally to this work.

Table S1. MZmine parameters

Figure S1. DPPH inhibitory activity of inactive extracts.

**Table S1.** MZmine parameters

| <i>Module</i>                                                                                | <i>Parameters</i>                                                                                                                                                                                                                                                                                                                                                                                             |
|----------------------------------------------------------------------------------------------|---------------------------------------------------------------------------------------------------------------------------------------------------------------------------------------------------------------------------------------------------------------------------------------------------------------------------------------------------------------------------------------------------------------|
| Raw data methods > Raw data import                                                           | Importation of all .mzXML files                                                                                                                                                                                                                                                                                                                                                                               |
| Raw data methods > Mass detection                                                            | Scans MS level : <b>1</b><br>Mass detector : <b>centroid</b><br>Noise level : <b>2.0E2</b> ; <b>1.5E2</b>                                                                                                                                                                                                                                                                                                     |
| Raw data methods > Mass detection                                                            | Scans MS level : <b>2</b><br>Mass detector : <b>centroid</b><br>Noise level : <b>1.3E1</b>                                                                                                                                                                                                                                                                                                                    |
| Feature detection > LC-MS > ADAP chromatogram builder                                        | Scans MS level : <b>1</b><br>Min group group size in # of scans : <b>4</b><br>Group intensity threshold : <b>1.0E3</b><br>Min highest intensity : <b>1.0E3</b><br>Scan to scan accuracy (m/z) : <b>10 ppm</b>                                                                                                                                                                                                 |
| Feature detection > Chromatogram resolving > Local minimum resolver                          | Chromatographic threshold : <b>20%</b><br>Minimum search range RT/Mobility (absolute) : <b>0.10</b><br>Minimum relative height : <b>15%</b><br>Minimum absolute height : <b>2.0E3</b> ; <b>1.0E3</b><br>Min ratio of peak top/edge : <b>3</b><br>Peak duration range (min/mobility) : <b>0.01 -1.00</b><br>Min # of data points : <b>3</b>                                                                    |
| Feature list methods > Isotopes > <sup>13</sup> C isotope filter                             | m/z tolerance : <b>10 ppm</b><br>Retention time tolerance : <b>0.1 absolute (min)</b><br>Mobility tolerance : <b>unchecked</b><br>Monotonic shape : <b>unchecked</b><br>Maximum charge : <b>2</b><br>Representative isotope : <b>most intense</b><br>Never remove feature with MS2 : <b>checked</b>                                                                                                           |
| Feature list methods > Alignment > Join aligner (within replicates)                          | m/z tolerance : <b>10 ppm</b><br>Weight for m/z : <b>75</b><br>Retention time tolerance : <b>0.2 absolute (min)</b><br>Weight for RT : <b>25</b><br>Mobility tolerance : <b>unchecked</b><br>Mobility weight : <b>1.00</b><br>Require same charge state : <b>checked</b><br>Require same ID : <b>unchecked</b><br>Compare isotope pattern : <b>unchecked</b><br>Compare spectra similarity : <b>unchecked</b> |
| Feature list methods > Processing > Assign MS <sup>2</sup> to features                       | Retention time tolerance : <b>0.1 absolute (min)</b><br>MS1 to MS2 precursor tolerance (m/z ) : <b>10 ppm</b><br>Limit by RT edges : <b>unchecked</b><br>Combine MS/MS spectra (TIMS) : <b>unchecked</b><br>Lock to feature mobility range : <b>unchecked</b><br>Minimum merged intensity : <b>unchecked</b>                                                                                                  |
| Feature list methods > Feature list filtering > Feature list rows filter (within replicates) | Minimum features in a row (abs or %) : <b>3</b><br>Retention time : <b>0.6 - 30.0 min (auto range)</b><br>Features with MS2 scans : <b>checked</b>                                                                                                                                                                                                                                                            |

|                                                                                              |                                                                                                                                                                                                                                                                                                                                                                                                                                                                                                                                                                          |
|----------------------------------------------------------------------------------------------|--------------------------------------------------------------------------------------------------------------------------------------------------------------------------------------------------------------------------------------------------------------------------------------------------------------------------------------------------------------------------------------------------------------------------------------------------------------------------------------------------------------------------------------------------------------------------|
| Feature list methods > Alignment > Join aligner (across all samples)                         | m/z tolerance : <b>10 ppm</b><br>Weight for m/z : <b>75</b><br>Retention time tolerance : <b>0.2 absolute (min)</b><br>Weight for RT : <b>25</b><br>Mobility tolerance : <b>unchecked</b><br>Mobility weight : <b>1.0</b><br>Require same charge state : <b>checked</b><br>Require same ID : <b>unchecked</b><br>Compare isotope pattern : <b>unchecked</b><br>Compare spectra similarity : <b>unchecked</b>                                                                                                                                                             |
| Feature list method > Feature list filtering > Feature list rows filter (across all samples) | Minimum features in a row (abs or %) : <b>3</b><br>Retention time : <b>0.6 - 30.0 min (auto range)</b><br>Features with MS2 scans : <b>checked</b><br>Reset the feature number ID : <b>checked</b>                                                                                                                                                                                                                                                                                                                                                                       |
| Feature list method > Export feature list > GNPS - feature based molecular networking        | Merge MS/MS (experimental) : <b>checked</b><br>Select spectra to merge : <b>across samples</b><br>m/z merge mode : <b>most intense</b><br>intensity merge mode : <b>maximum intensity</b><br>Expected mass deviation : <b>5 ppm</b><br>Cosine threshold : <b>70 %</b><br>Signal count threshold : <b>20 %</b><br>Isolation window offset : <b>0.0</b><br>Isolation window width (m/z) : <b>3.0</b><br>Filter rows : <b>ALL</b><br>Feature intensity : <b>Peak area</b><br>CSV export : <b>ALL</b><br>Submit to GNPS : <b>unchecked</b><br>Open folder : <b>unchecked</b> |

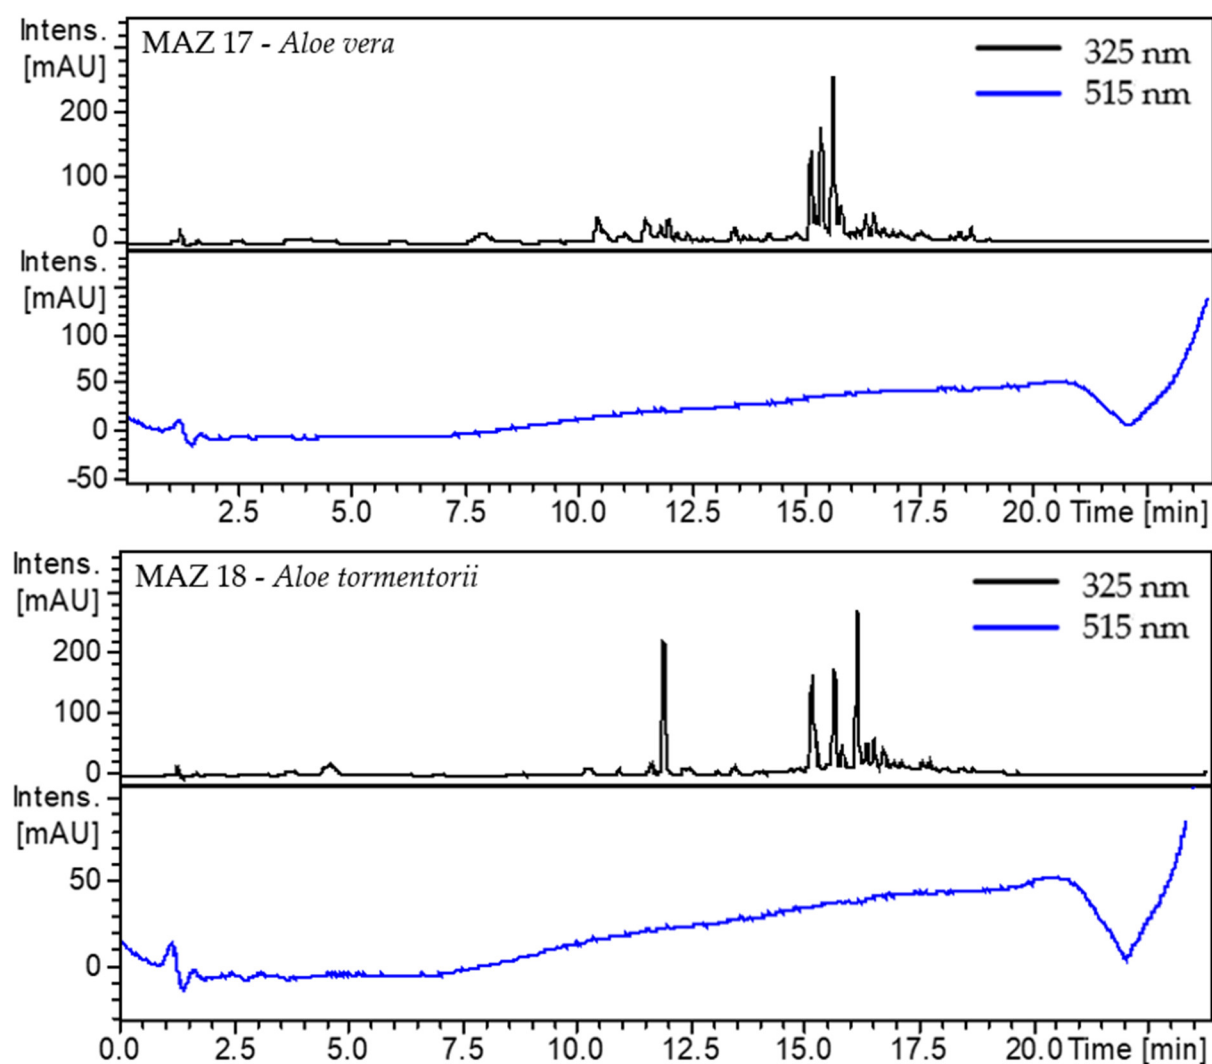

**Figure S1.** DPPH inhibitory activity of inactive extracts.
